# Supplementary material
Source: HighWire-hosted journal article supplement (https://www.jneurosci.org/highwire/filestream/598291/field_highwire_adjunct_files/0/Supp_Table_Kalisch.pdf)
Supplement: Supp_Table_Kalisch.pdf [file Supp_Table_Kalisch.pdf]

## SUPPORTING ONLINE MATERIAL

**Supplemental Table 1:** SPM results for the entire scan volume

| <b>z-value</b>                     | <b>p-value<br/>(uncorr.)</b> | <b>p-value<br/>(SVC)</b> | <b>x<br/>(MNI)</b> | <b>y<br/>space</b> | <b>z</b> | <b>localization</b>                    |
|------------------------------------|------------------------------|--------------------------|--------------------|--------------------|----------|----------------------------------------|
| <b>(CS+&gt;CS-)A</b>               |                              |                          |                    |                    |          |                                        |
| 3.11                               | 0.001                        |                          | -50                | -62                | -2       | L middle temporal gyrus                |
| <b>(CS+&gt;CS-)A, RT-modulated</b> |                              |                          |                    |                    |          |                                        |
| 3.81                               | <0.001                       |                          | -22                | 0                  | -2       | L striatum                             |
| 3.73                               | <0.001                       |                          | -58                | -6                 | -42      | L inferior temporal gyrus              |
| 3.41                               | <0.001                       |                          | -40                | -54                | -4       | L lateral occipito-<br>temporal sulcus |
| 3.34                               | <0.001                       |                          | 2                  | -52                | -18      | cerebellum                             |
| 3.29                               | <0.001                       |                          | 0                  | -18                | -6       | hypothalamus                           |
| 3.24                               | 0.001                        | 0.045                    | 38                 | -32                | -12      | R hippocampus                          |
| 3.2                                | 0.001                        |                          | 20                 | 6                  | -8       | R striatum                             |
| 2.94                               | 0.002                        |                          | 10                 | -50                | -30      | R cerebellum                           |
| 2.94                               | 0.002                        |                          | -28                | -2                 | -32      | L amygdala                             |
| 2.93                               | 0.002                        |                          | 8                  | -26                | -34      | R brainstem                            |
| 2.92                               | 0.002                        |                          | 30                 | -22                | -26      | R collateral sulcus                    |
| 2.90                               | 0.002                        |                          | -36                | -10                | -14      | L mid-insula                           |

|      |       |    |    |     |                                     |
|------|-------|----|----|-----|-------------------------------------|
| 2.89 | 0.002 | 28 | 14 | -28 | R inferior insula/<br>posterior OFC |
|------|-------|----|----|-----|-------------------------------------|

|                      |
|----------------------|
| <b>(CS+&gt;CS-)B</b> |
|----------------------|

|      |        |     |     |     |                               |
|------|--------|-----|-----|-----|-------------------------------|
| 3.85 | <0.001 | 40  | 28  | -44 | R temporal pole               |
| 3.47 | <0.001 | 44  | -62 | 20  | R superior temporal<br>sulcus |
| 3.45 | <0.001 | -20 | -56 | -40 | L cerebellum                  |
| 3.39 | <0.001 | 40  | -4  | 24  | R insula                      |
| 3.16 | 0.001  | -22 | 32  | 40  | L superior frontal<br>sulcus  |
| 3.11 | 0.001  | -54 | 14  | -36 | L superior temporal<br>gyrus  |

|                                    |
|------------------------------------|
| <b>(CS+&gt;CS-)B, RT-modulated</b> |
|------------------------------------|

|      |        |     |      |     |                                                       |
|------|--------|-----|------|-----|-------------------------------------------------------|
| 3.99 | <0.001 | 22  | -108 | 6   | R occipital pole                                      |
| 3.75 | <0.001 | -20 | -22  | -26 | L hippocampus/<br>entorhinal cortex                   |
| 3.63 | <0.001 | -14 | -8   | -18 | L amygdala/ventral<br>striatum                        |
| 3.55 | <0.001 | -22 | -10  | -10 | L ventral striatum                                    |
| 3.41 | <0.001 | -30 | -76  | 16  | L lateral occipital or<br>superior temporal<br>sulcus |
| 3.35 | <0.001 | -2  | -74  | 18  | cuneus                                                |

|      |       |  |     |     |   |                            |
|------|-------|--|-----|-----|---|----------------------------|
| 3.28 | 0.001 |  | -28 | -84 | 2 | L lateral occipital sulcus |
|------|-------|--|-----|-----|---|----------------------------|

|                                 |
|---------------------------------|
| $(CS+>CS-)_{A} > (CS+>CS-)_{B}$ |
|---------------------------------|

no voxels surviving threshold

|                                                |
|------------------------------------------------|
| $(CS+>CS-)_{A} > (CS+>CS-)_{B}$ , RT-modulated |
|------------------------------------------------|

|      |        |  |     |    |     |                              |
|------|--------|--|-----|----|-----|------------------------------|
| 3.63 | <0.001 |  | -60 | -8 | -42 | L inferior temporal<br>gyrus |
|------|--------|--|-----|----|-----|------------------------------|

|                                 |
|---------------------------------|
| $(CS+>CS-)_{B} > (CS+>CS-)_{A}$ |
|---------------------------------|

|      |        |                      |     |     |     |                                     |
|------|--------|----------------------|-----|-----|-----|-------------------------------------|
| 4.18 | <0.001 |                      | -30 | 12  | -30 | L posterior OFC/ventral<br>insula   |
| 4.01 | <0.001 | 0.011 <sup>(1)</sup> | -22 | -12 | -36 | L hippocampus/<br>entorhinal cortex |
| 3.67 | <0.001 | 0.043 <sup>(2)</sup> | -26 | -22 | -30 | L hippocampus/<br>entorhinal cortex |
| 3.55 | <0.001 | 0.048                | -2  | 42  | -22 | L VMPFC                             |
| 3.23 | 0.001  |                      | 0   | 30  | -26 | VMPFC                               |
| 3.54 | <0.001 |                      | 42  | 30  | -40 | R temporal pole                     |
| 3.51 | <0.001 | 0.062                | 6   | 50  | -12 | R VMPFC                             |
| 3.42 | <0.001 |                      | -16 | -56 | -36 | L cerebellum                        |
| 3.37 | <0.001 |                      | -66 | -6  | -20 | L middle temporal gyrus             |
| 3.3  | <0.001 |                      | -46 | -12 | -38 | L inferior temporal                 |

|      |       |     |     |     |                         |
|------|-------|-----|-----|-----|-------------------------|
|      |       |     |     |     | gyrus                   |
| 3.25 | 0.001 | -44 | 30  | -24 | L lateral orbital gyrus |
| 3.18 | 0.001 | -70 | -34 | 2   | L superior temporal     |
|      |       |     |     |     | gyrus                   |
| 3.13 | 0.001 | 32  | -26 | -30 | R collateral sulcus     |

|                                                       |        |    |    |     |                         |
|-------------------------------------------------------|--------|----|----|-----|-------------------------|
| <b>(CS+&gt;CS-)B &gt; (CS+&gt;CS-)A, RT-modulated</b> |        |    |    |     |                         |
| 3.49                                                  | <0.001 | 36 | 64 | -12 | R lateral orbital gyrus |

T-tests, degrees of freedom: 16, statistical threshold  $P \leq 0.001$  uncorrected, one-tailed, unless indicated otherwise.

ACC: anterior cingulate cortex, OFC: orbital frontal cortex, MNI: Montreal Neurological Institute, RT: reaction time, SVC: small volume correction, VMPFC: ventromedial prefrontal cortex.

<sup>(1)</sup>SVC shifts maximum to -24/-12/-32

<sup>(2)</sup>SVC shifts maximum to -26/-18/-26
